# Supplementary material for: Serum Magnesium Concentrations in the Canadian Population and Associations with Diabetes, Glycemic Regulation, and Insulin Resistance
Source: PubMed Central journal article supplement (PMC5372959; doi:10.3390/nu9030296), 2017-03-17
Supplement: nutrients-09-00296-s001.pdf [file nutrients-09-00296-s001.pdf]

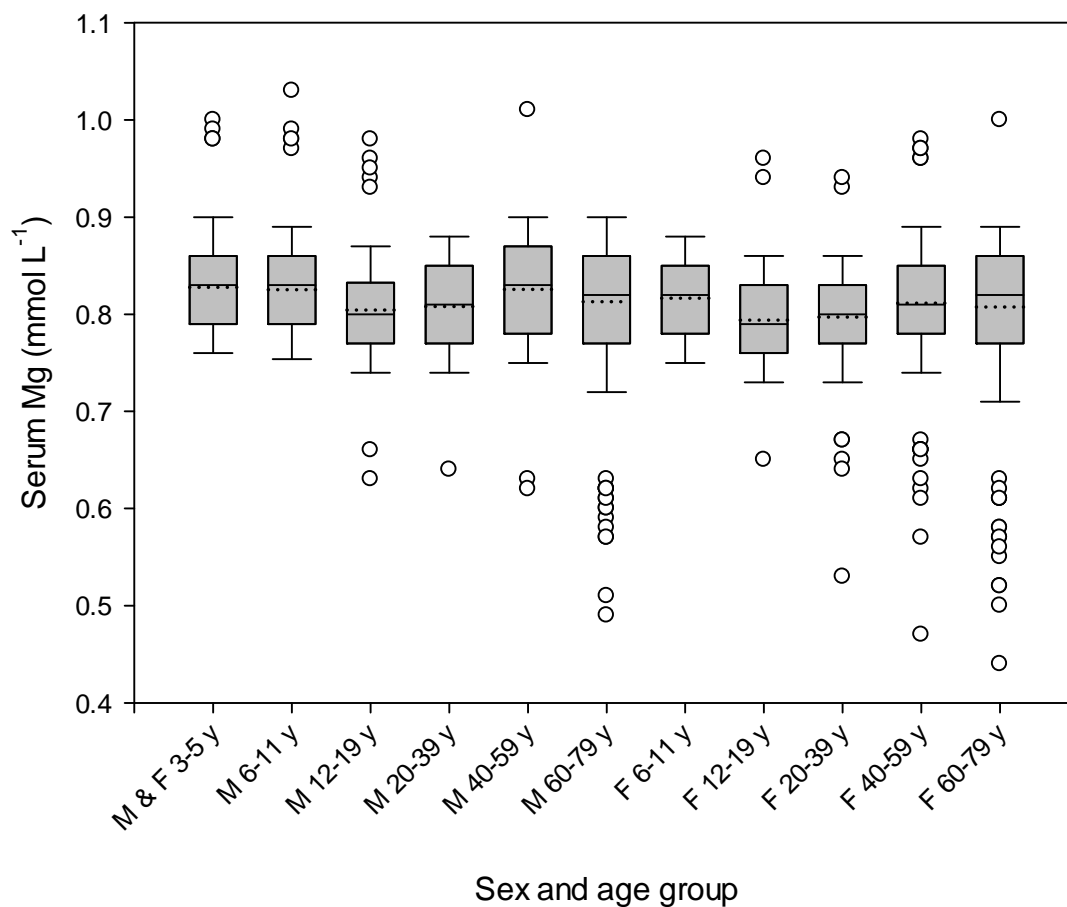

**Figure S1.** Boxplots of serum Mg concentrations by sex-age group. Open circles represent outliers (values greater or less than  $1.5 \times$  interquartile range). The median (solid line) and mean (dashed line) for each group is shown within the box. Whiskers represent the 10<sup>th</sup> and the 90<sup>th</sup> percentiles. The number of participants in each group is the same as shown in Table 1. F, females; M, males.

**Table S1.** Means and distributions of serum magnesium concentrations by sex and age in fasted and nonfasted Canadians.

| Sex and age          | n   | Serum magnesium              |            | Distribution of serum magnesium concentrations |            |      |            |      |            |      |            |      |            |      |            |      |            |
|----------------------|-----|------------------------------|------------|------------------------------------------------|------------|------|------------|------|------------|------|------------|------|------------|------|------------|------|------------|
|                      |     | Arithmetic mean <sup>1</sup> | 95% CI     | 5th                                            |            | 10th |            | 25th |            | 50th |            | 75th |            | 90th |            | 95th |            |
| mmol L <sup>-1</sup> |     |                              |            |                                                |            |      |            |      |            |      |            |      |            |      |            |      |            |
| Fasted               |     |                              |            |                                                |            |      |            |      |            |      |            |      |            |      |            |      |            |
| <b>Male</b>          |     |                              |            |                                                |            |      |            |      |            |      |            |      |            |      |            |      |            |
| 6–11 y               | 242 | 0.82 <sup>*,#</sup>          | 0.81, 0.82 | 0.73                                           | 0.72, 0.75 | 0.75 | 0.73, 0.77 | 0.78 | 0.76, 0.80 | 0.82 | 0.80, 0.83 | 0.84 | 0.83, 0.86 | 0.87 | 0.85, 0.89 | 0.89 | 0.87, 0.90 |
| 12–19 y              | 244 | 0.80                         | 0.79, 0.82 | 0.73                                           | 0.71, 0.75 | 0.74 | 0.72, 0.76 | 0.76 | 0.74, 0.79 | 0.79 | 0.77, 0.82 | 0.83 | 0.81, 0.85 | 0.87 | 0.84, 0.89 | 0.88 | 0.86, 0.90 |
| 20–39 y              | 270 | 0.81                         | 0.80, 0.82 | 0.71                                           | 0.65, 0.78 | 0.74 | 0.72, 0.77 | 0.78 | 0.76, 0.80 | 0.80 | 0.79, 0.82 | 0.84 | 0.82, 0.85 | 0.87 | 0.84, 0.89 | 0.89 | 0.85, 0.94 |
| 40–59 y              | 294 | 0.81                         | 0.79, 0.84 | 0.70                                           | 0.64, 0.76 | 0.72 | 0.66, 0.78 | 0.77 | 0.74, 0.81 | 0.81 | 0.78, 0.84 | 0.85 | 0.81, 0.88 | 0.89 | 0.86, 0.92 | 0.90 | 0.87, 0.94 |
| 60–79 y              | 264 | 0.82                         | 0.81, 0.83 | 0.71                                           | 0.66, 0.77 | 0.74 | 0.72, 0.76 | 0.77 | 0.75, 0.79 | 0.82 | 0.80, 0.84 | 0.86 | 0.85, 0.88 | 0.90 | 0.88, 0.92 | 0.91 | 0.90, 0.93 |
| <b>Female</b>        |     |                              |            |                                                |            |      |            |      |            |      |            |      |            |      |            |      |            |
| 6–11 y               | 203 | 0.80 <sup>b,#</sup>          | 0.80, 0.81 | 0.73                                           | 0.71, 0.74 | 0.74 | 0.73, 0.76 | 0.77 | 0.75, 0.79 | 0.80 | 0.78, 0.82 | 0.83 | 0.82, 0.85 | 0.86 | 0.84, 0.87 | 0.87 | 0.85, 0.88 |
| 12–19 y              | 239 | 0.79 <sup>b</sup>            | 0.78, 0.80 | 0.70                                           | 0.68, 0.73 | 0.73 | 0.70, 0.76 | 0.75 | 0.73, 0.77 | 0.78 | 0.77, 0.80 | 0.83 | 0.81, 0.84 | 0.86 | 0.84, 0.87 | 0.87 | 0.85, 0.89 |
| 20–39 y              | 269 | 0.80 <sup>b</sup>            | 0.78, 0.81 | 0.70                                           | 0.66, 0.75 | 0.73 | 0.70, 0.76 | 0.76 | 0.72, 0.79 | 0.80 | 0.78, 0.82 | 0.83 | 0.80, 0.86 | 0.85 | 0.82, 0.89 | 0.87 | 0.85, 0.90 |
| 40–59 y              | 249 | 0.80 <sup>b</sup>            | 0.79, 0.82 | 0.70                                           | 0.67, 0.73 | 0.73 | 0.70, 0.76 | 0.75 | 0.73, 0.77 | 0.80 | 0.77, 0.83 | 0.84 | 0.82, 0.86 | 0.87 | 0.84, 0.91 | 0.92 | 0.86, 0.97 |
| 60–79 y              | 278 | 0.83 <sup>a,#</sup>          | 0.81, 0.85 | 0.69                                           | 0.66, 0.73 | 0.73 | 0.70, 0.77 | 0.79 | 0.76, 0.82 | 0.83 | 0.81, 0.85 | 0.88 | 0.86, 0.91 | 0.91 | 0.89, 0.93 | 0.92 | 0.88, 0.97 |
| Nonfasted            |     |                              |            |                                                |            |      |            |      |            |      |            |      |            |      |            |      |            |
| <b>Male</b>          |     |                              |            |                                                |            |      |            |      |            |      |            |      |            |      |            |      |            |
| 6–11 y               | 251 | 0.85 <sup>a</sup>            | 0.83, 0.86 | 0.75                                           | 0.72, 0.79 | 0.77 | 0.74, 0.80 | 0.81 | 0.79, 0.82 | 0.84 | 0.83, 0.85 | 0.87 | 0.85, 0.89 | 0.90 | 0.87, 0.93 | 0.93 | 0.88, 0.97 |
| 12–19 y              | 246 | 0.80 <sup>c</sup>            | 0.78, 0.81 | 0.69                                           | 0.64, 0.74 | 0.72 | 0.69, 0.75 | 0.75 | 0.72, 0.79 | 0.79 | 0.77, 0.81 | 0.83 | 0.80, 0.85 | 0.87 | 0.84, 0.90 | 0.89 | 0.86, 0.91 |
| 20–39 y              | 240 | 0.80 <sup>c</sup>            | 0.79, 0.81 | 0.68                                           | 0.65, 0.72 | 0.71 | 0.67, 0.75 | 0.76 | 0.73, 0.79 | 0.81 | 0.79, 0.82 | 0.83 | 0.81, 0.85 | 0.88 | 0.85, 0.90 | 0.89 | 0.86, 0.92 |
| 40–59 y              | 244 | 0.83 <sup>ab,*</sup>         | 0.82, 0.84 | 0.72                                           | 0.68, 0.75 | 0.75 | 0.71, 0.78 | 0.79 | 0.77, 0.81 | 0.83 | 0.80, 0.85 | 0.86 | 0.84, 0.89 | 0.91 | 0.88, 0.93 | 0.93 | 0.90, 0.96 |
| 60–79 y              | 245 | 0.81 <sup>bc</sup>           | 0.80, 0.82 | 0.69                                           | 0.67, 0.70 | 0.71 | 0.67, 0.74 | 0.76 | 0.73, 0.79 | 0.81 | 0.79, 0.83 | 0.85 | 0.84, 0.87 | 0.89 | 0.87, 0.91 | 0.91 | 0.87, 0.94 |
| <b>Female</b>        |     |                              |            |                                                |            |      |            |      |            |      |            |      |            |      |            |      |            |
| 6–11 y               | 252 | 0.83 <sup>a</sup>            | 0.82, 0.84 | 0.76                                           | 0.73, 0.78 | 0.77 | 0.75, 0.79 | 0.79 | 0.77, 0.81 | 0.83 | 0.82, 0.85 | 0.86 | 0.85, 0.88 | 0.88 | 0.87, 0.90 | 0.89 | 0.88, 0.91 |
| 12–19 y              | 247 | 0.79 <sup>c</sup>            | 0.78, 0.80 | 0.70                                           | 0.67, 0.73 | 0.71 | 0.70, 0.73 | 0.74 | 0.71, 0.77 | 0.78 | 0.77, 0.80 | 0.81 | 0.80, 0.83 | 0.85 | 0.83, 0.87 | 0.88 | 0.86, 0.90 |
| 20–39 y              | 242 | 0.79 <sup>bc</sup>           | 0.78, 0.81 | 0.71                                           | 0.69, 0.73 | 0.72 | 0.69, 0.75 | 0.76 | 0.74, 0.79 | 0.78 | 0.77, 0.80 | 0.82 | 0.79, 0.85 | 0.86 | 0.84, 0.88 | 0.87 | 0.84, 0.91 |
| 40–59 y              | 283 | 0.81 <sup>b</sup>            | 0.80, 0.82 | 0.65                                           | 0.52, 0.78 | 0.73 | 0.68, 0.78 | 0.77 | 0.75, 0.79 | 0.81 | 0.79, 0.83 | 0.86 | 0.84, 0.87 | 0.87 | 0.86, 0.89 | 0.89 | 0.87, 0.90 |
| 60–79 y              | 254 | 0.81 <sup>bc</sup>           | 0.79, 0.81 | 0.66                                           | 0.63, 0.68 | 0.70 | 0.66, 0.74 | 0.75 | 0.73, 0.77 | 0.81 | 0.79, 0.82 | 0.85 | 0.84, 0.87 | 0.89 | 0.84, 0.94 | 0.94 | 0.89, 1.00 |

<sup>1</sup> For fasted or nonfasted participants, values in a column and within a sex group without a common superscript letter differ,  $p < 0.05$ . \* Different compared to females in the same age group and fasted or nonfasted state,  $p < 0.05$ . # Different compared to nonfasted participants in the same sex-age group,  $p < 0.05$ .
